# Supplementary material for: Genetic structure in the southernmost populations of black-and-gold howler monkeys (Alouatta caraya) and its conservation implications
Source: PubMed Central journal article supplement (PMC5624639; doi:10.1371/journal.pone.0185867), 2017-10-02
Supplement: pone.0185867.s001.pdf [file pone.0185867.s001.pdf]

**Genetic structure of southernmost populations of black-and-gold howler monkeys (*Alouatta caraya*) and its conservation implications.**

Luciana I. Oklander, Carolina I. Miño, Gabriela Fernández, Mariela Caputo, Daniel Corach

**Table A. Summary estimates of mitochondrial diversity.**

Genetic diversity estimates, results of neutrality tests and demographic parameters for black-and-gold howler monkeys sampled in ten populations from Northeastern Argentina and Southern Paraguay, based on 491-bp mtDNA Control Region fragment sequences. *H*: number of haplotypes (*n*: number of sequences). *PS*: number of polymorphic sites; *h*: haplotypic diversity  $\pm$  standard deviation (*SD*);  $\pi$ : nucleotidic diversity  $\pm$  standard deviation (*SD*); Tajima's (1989) *D*; Fu's (1997) *F<sub>s</sub>*; Ramos-Onsins and Rozas's (2002) *R<sub>2</sub>*; *SSD*: Sum of Squared Deviations, *R<sub>g</sub>*: Raggedness index; *Tau*: mode of the unimodal mismatch distribution; *TSE*: time since population expansion (in years before present).

| <i>Statistic</i>         | <b>Pop 1</b> | <b>Pop 2</b> | <b>Pop 3</b> | <b>Pop 4</b> | <b>Pop 5</b> | <b>Pop 6</b> | <b>Pop 7</b> | <b>Pop 8</b> | <b>Pop 9</b> | <b>Pop 10</b> |
|--------------------------|--------------|--------------|--------------|--------------|--------------|--------------|--------------|--------------|--------------|---------------|
| <i>H</i> ( <i>n</i> )    | 2 (2)        | 6 (10)       | 1 (11)       | 3 (8)        | 2 (8)        | 1 (8)        | 5 (6)        | 1(4)         | 3 (7)        | 2 (8)         |
| <i>PS</i>                | 1            | 14           | 0            | 6            | 5            | 0            | 9            | 0            | 24           | 6             |
| <i>h</i> $\pm$ <i>SD</i> | 1            | 0.911        | 0            | 0.714        | 0.536        | 0            | 0.933        | 0            | 0.524        | 0.536         |
|                          |              | $\pm$ 0.035  |              | $\pm$ 0.123  | $\pm$ 0.123  |              | $\pm$ 0.122  |              | $\pm$ 0.209  | $\pm$ 0.123   |
| $\pi$ $\pm$ <i>SD</i>    | 0.001        | 0.012        | 0            | 0.005        | 0.005        | 0            | 0.008        | 0            | 0.019        | 0.006         |
|                          | $\pm$ 0.003  | $\pm$ 0.007  |              | $\pm$ 0.006  | $\pm$ 0.003  |              | $\pm$ 0.005  |              | $\pm$ 0.011  | $\pm$ 0.004   |
| <i>D</i>                 | -            | 1.199        | -            | 0.806        | 1.764        | -            | -0.113       | -            | 0.063        | 1.813         |
| <i>F<sub>s</sub></i>     | -            | 0.920        | -            | 2.285        | 4.413        | -            | -0.807       | -            | 5.712        | 5.011         |
| <i>R<sup>2</sup></i>     | 0.500        | 0.223        | -            | 0.226        | 0.268        | -            | 0.203        | -            | 0.176        | 0.268         |
| <i>SSD</i>               | 0.000        | 0.039        | 0.000        | 0.111        | <b>0.340</b> | 0.000        | 0.028        | 0.000        | <b>0.330</b> | 0.000         |
| <i>R<sub>g</sub></i>     | 0.000        | 0.060        | 0.000        | 0.204        | 0.790        | 0.000        | 0.093        | 0.000        | 0.685        | 0.789         |
| <i>Tau</i>               | 0.000        | 9.797        | 0.000        | 7.072        | 6.211        | 0.000        | 5.328        | 0.000        | 0.000        | 0.000         |
| <i>TSE</i>               | -            | 12,756       | -            | 9,208        | 8,087        | -            | 6,937        | -            | -            | -             |

**Table B. Results of modified STRUCTURE procedure.**

The most likely number of differentiated genetic groups ( $K = 4$ , column shaded in grey) found to better explain the variation observed in the genotypic dataset (ten microsatellite *loci*) of black-and-gold howler monkeys from Northeastern Argentina and Southern Paraguay. The Max-of-Median (*MaxMedK*) and Median-of-Median (*MedMedK*) indexes (Puechmaille, 2016), taken at the 0.80 threshold of membership proportion, were used as conservative estimators of  $K$ . The different sampling schemes tested were: 1) the full dataset ( $n = 138$ , ten sites), 2) subsampling Pop 2 and 3 to obtain more even sample sizes ( $n = 88$ , ten sites), 3) original dataset but removing the least sampled populations ( $n = 123$ , seven sites), and 4) the dataset obtained by a combination of the two latter strategies ( $n = 73$ , seven sites) (see main text for further details). For each sampling scheme, 20 replicate STRUCTURE runs were performed from  $K = 2$  to  $K = 10$ .

| <b>Sampling strategy</b>                          | <b>Index</b>       | <b>K=2</b> | <b>K=3</b> | <b>K=4</b> | <b>K=5</b> | <b>K=6</b> |
|---------------------------------------------------|--------------------|------------|------------|------------|------------|------------|
| 1 – Full dataset                                  | <i>MaxMedK_0.8</i> | 2          | 3          | 4          | 4          | 3          |
| 1 – Full dataset                                  | <i>MedMedK_0.8</i> | 2          | 3          | 4          | 4          | 2          |
| 2 – Even sample sizes                             | <i>MaxMedK_0.8</i> | 2          | 3          | 4          | 5          | 3          |
| 2 – Even sample sizes                             | <i>MedMedK_0.8</i> | 2          | 3          | 4          | 3          | 2          |
| 3 – Remove samples $n \leq 6$                     | <i>MaxMedK_0.8</i> | 2          | 3          | 4          | 5          | 4          |
| 3 – Remove samples $n \leq 6$                     | <i>MedMedK_0.8</i> | 2          | 3          | 4          | 4          | 3          |
| 4 – Even sample sizes + remove samples $n \leq 6$ | <i>MaxMedK_0.8</i> | 2          | 3          | 4          | 4          | 4          |
| 4 – Even sample sizes + remove samples $n \leq 6$ | <i>MedMedK_0.8</i> | 2          | 3          | 4          | 2.5        | 4          |

**Table C. Genetic structure observed in populations of black-and-gold howler monkeys from Northeastern Argentina and Southern Paraguay.**

Pairwise  $F_{ST}$  values for ten microsatellite *loci* (below diagonal) and pairwise  $\Phi_{ST}$  values for 512-bp mtDNA Control Region fragment sequences (above diagonal). Significant values after Bonferroni correction are shown in bold ( $\alpha = 0.0005$ ).

|        | Pop 1        | Pop 2        | Pop 3        | Pop 4        | Pop 5        | Pop 6        | Pop 7        | Pop 8        | Pop 9        | Pop 10       |
|--------|--------------|--------------|--------------|--------------|--------------|--------------|--------------|--------------|--------------|--------------|
| Pop 1  |              | -0.013       | 0.710        | 0.585        | 0.582        | 0.985        | 0.509        | 0.961        | 0.505        | 0.601        |
| Pop 2  | 0.039        |              | 0.352        | 0.164        | 0.141        | 0.468        | 0.263        | 0.345        | 0.506        | 0.287        |
| Pop 3  | <b>0.142</b> | <b>0.077</b> |              | <b>0.815</b> | <b>0.814</b> | <b>1.000</b> | <b>0.802</b> | <b>1.000</b> | <b>0.760</b> | <b>0.818</b> |
| Pop 4  | 0.050        | 0.015        | <b>0.075</b> |              | 0.062        | <b>0.741</b> | 0.438        | 0.628        | 0.577        | 0.442        |
| Pop 5  | <b>0.105</b> | <b>0.053</b> | <b>0.114</b> | 0.039        |              | <b>0.675</b> | 0.433        | 0.686        | 0.599        | <b>0.449</b> |
| Pop 6  | <b>0.261</b> | <b>0.133</b> | <b>0.177</b> | <b>0.183</b> | <b>0.107</b> |              | <b>0.662</b> | <b>1.000</b> | <b>0.709</b> | <b>0.643</b> |
| Pop 7  | <b>0.075</b> | <b>0.071</b> | <b>0.153</b> | 0.006        | <b>0.097</b> | <b>0.241</b> |              | 0.544        | 0.579        | 0.309        |
| Pop 8  | <b>0.119</b> | <b>0.080</b> | <b>0.177</b> | <b>0.092</b> | <b>0.081</b> | <b>0.244</b> | 0.029        |              | 0.562        | 0.543        |
| Pop 9  | <b>0.133</b> | <b>0.046</b> | <b>0.109</b> | <b>0.095</b> | 0.044        | <b>0.200</b> | 0.028        | 0.027        |              | <b>0.622</b> |
| Pop 10 | <b>0.131</b> | <b>0.110</b> | <b>0.171</b> | 0.063        | <b>0.087</b> | <b>0.262</b> | -0.014       | 0.070        | 0.061        |              |
